# Supplementary material
Source: bioRxiv or medRxiv preprint supplement (https://medrxiv.org/content/medrxiv/early/2022/03/12/2022.03.09.22271844/DC1/embed/media-1.pdf)
Supplement: Supplementary file [file media-1.pdf]

## ICMJE DISCLOSURE FORM

**Date:** 3/9/2022

**Your Name:** Ann Van de Winckel

**Manuscript Title:** Using remotely delivered Spring Forest Qigong™ to reduce neuropathic pain in adults with spinal cord injury: Protocol of a quasi-experimental clinical trial

**Manuscript Number (if known):** MEDRXIV/2022/271844

In the interest of transparency, we ask you to disclose all relationships/activities/interests listed below that are related to the content of your manuscript. “Related” means any relation with for-profit or not-for-profit third parties whose interests may be affected by the content of the manuscript. Disclosure represents a commitment to transparency and does not necessarily indicate a bias. If you are in doubt about whether to list a relationship/activity/interest, it is preferable that you do so.

The author’s relationships/activities/interests should be defined broadly. For example, if your manuscript pertains to the epidemiology of hypertension, you should declare all relationships with manufacturers of antihypertensive medication, even if that medication is not mentioned in the manuscript.

In item #1 below, report all support for the work reported in this manuscript without time limit. For all other items, the time frame for disclosure is the past 36 months.

|                                                                                                                                                     | Name all entities with whom you have this relationship or indicate none (add rows as needed)                                                                                   | Specifications/Comments (e.g., if payments were made to you or to your institution)                                                                                                                                                                                                                                                                                                                                                                                                                                                                                                                                                                                                                                                                                                                                                                                                                                                                                                                                          |                                                                                                                                                     |                                                                                                                                          |                                                                                                                                           |                                                                        |                                                          |  |
|-----------------------------------------------------------------------------------------------------------------------------------------------------|--------------------------------------------------------------------------------------------------------------------------------------------------------------------------------|------------------------------------------------------------------------------------------------------------------------------------------------------------------------------------------------------------------------------------------------------------------------------------------------------------------------------------------------------------------------------------------------------------------------------------------------------------------------------------------------------------------------------------------------------------------------------------------------------------------------------------------------------------------------------------------------------------------------------------------------------------------------------------------------------------------------------------------------------------------------------------------------------------------------------------------------------------------------------------------------------------------------------|-----------------------------------------------------------------------------------------------------------------------------------------------------|------------------------------------------------------------------------------------------------------------------------------------------|-------------------------------------------------------------------------------------------------------------------------------------------|------------------------------------------------------------------------|----------------------------------------------------------|--|
| Time frame: Since the initial planning of the work                                                                                                  |                                                                                                                                                                                |                                                                                                                                                                                                                                                                                                                                                                                                                                                                                                                                                                                                                                                                                                                                                                                                                                                                                                                                                                                                                              |                                                                                                                                                     |                                                                                                                                          |                                                                                                                                           |                                                                        |                                                          |  |
| <b>1</b>                                                                                                                                            | All support for the present manuscript (e.g., funding, provision of study materials, medical writing, article processing charges, etc.)<br><b>No time limit for this item.</b> | <input type="checkbox"/> None<br><br><table border="1" style="width: 100%; border-collapse: collapse;"> <tr> <td style="width: 50%; padding: 5px;">           This study is internally funded by the Division of Physical Therapy, Department of Rehabilitation Medicine, Medical School, University of Minnesota         </td> <td style="width: 50%; padding: 5px;">           This internal funding serves to pay the participants in this study as well as the cost of the Qigong class and video used in this study.         </td> </tr> <tr> <td style="padding: 5px;">           The research is supported by the National Institutes of Health’s National Center for Advancing Translational Sciences, grant UL1TR002494.         </td> <td style="padding: 5px;">           This funding serves to provide CTSI support to researchers at the UMN.         </td> </tr> <tr> <td colspan="2" style="padding: 5px; text-align: right;"> <small>Click the tab key to add additional rows.</small> </td> </tr> </table> | This study is internally funded by the Division of Physical Therapy, Department of Rehabilitation Medicine, Medical School, University of Minnesota | This internal funding serves to pay the participants in this study as well as the cost of the Qigong class and video used in this study. | The research is supported by the National Institutes of Health’s National Center for Advancing Translational Sciences, grant UL1TR002494. | This funding serves to provide CTSI support to researchers at the UMN. | <small>Click the tab key to add additional rows.</small> |  |
| This study is internally funded by the Division of Physical Therapy, Department of Rehabilitation Medicine, Medical School, University of Minnesota | This internal funding serves to pay the participants in this study as well as the cost of the Qigong class and video used in this study.                                       |                                                                                                                                                                                                                                                                                                                                                                                                                                                                                                                                                                                                                                                                                                                                                                                                                                                                                                                                                                                                                              |                                                                                                                                                     |                                                                                                                                          |                                                                                                                                           |                                                                        |                                                          |  |
| The research is supported by the National Institutes of Health’s National Center for Advancing Translational Sciences, grant UL1TR002494.           | This funding serves to provide CTSI support to researchers at the UMN.                                                                                                         |                                                                                                                                                                                                                                                                                                                                                                                                                                                                                                                                                                                                                                                                                                                                                                                                                                                                                                                                                                                                                              |                                                                                                                                                     |                                                                                                                                          |                                                                                                                                           |                                                                        |                                                          |  |
| <small>Click the tab key to add additional rows.</small>                                                                                            |                                                                                                                                                                                |                                                                                                                                                                                                                                                                                                                                                                                                                                                                                                                                                                                                                                                                                                                                                                                                                                                                                                                                                                                                                              |                                                                                                                                                     |                                                                                                                                          |                                                                                                                                           |                                                                        |                                                          |  |
| Time frame: past 36 months                                                                                                                          |                                                                                                                                                                                |                                                                                                                                                                                                                                                                                                                                                                                                                                                                                                                                                                                                                                                                                                                                                                                                                                                                                                                                                                                                                              |                                                                                                                                                     |                                                                                                                                          |                                                                                                                                           |                                                                        |                                                          |  |
| <b>2</b>                                                                                                                                            | Grants or contracts from any entity (if not indicated in item #1 above).                                                                                                       | <input type="checkbox"/> None<br><br><table border="1" style="width: 100%; border-collapse: collapse; height: 40px;"> <tr><td style="width: 50%;"></td><td style="width: 50%;"></td></tr> <tr><td style="width: 50%;"></td><td style="width: 50%;"></td></tr> </table>                                                                                                                                                                                                                                                                                                                                                                                                                                                                                                                                                                                                                                                                                                                                                       |                                                                                                                                                     |                                                                                                                                          |                                                                                                                                           |                                                                        |                                                          |  |
|                                                                                                                                                     |                                                                                                                                                                                |                                                                                                                                                                                                                                                                                                                                                                                                                                                                                                                                                                                                                                                                                                                                                                                                                                                                                                                                                                                                                              |                                                                                                                                                     |                                                                                                                                          |                                                                                                                                           |                                                                        |                                                          |  |
|                                                                                                                                                     |                                                                                                                                                                                |                                                                                                                                                                                                                                                                                                                                                                                                                                                                                                                                                                                                                                                                                                                                                                                                                                                                                                                                                                                                                              |                                                                                                                                                     |                                                                                                                                          |                                                                                                                                           |                                                                        |                                                          |  |

|           |                                                                                                              | Name all entities with whom you have this relationship or indicate none (add rows as needed)                                                                                                                                                                                                              | Specifications/Comments (e.g., if payments were made to you or to your institution) |  |  |  |  |  |  |
|-----------|--------------------------------------------------------------------------------------------------------------|-----------------------------------------------------------------------------------------------------------------------------------------------------------------------------------------------------------------------------------------------------------------------------------------------------------|-------------------------------------------------------------------------------------|--|--|--|--|--|--|
| <b>3</b>  | Royalties or licenses                                                                                        | <input type="checkbox"/> <b>None</b><br><table border="1" style="width: 100%; border-collapse: collapse;"> <tr><td style="width: 50%; height: 20px;"></td><td style="width: 50%;"></td></tr> <tr><td style="height: 20px;"></td><td></td></tr> <tr><td style="height: 20px;"></td><td></td></tr> </table> |                                                                                     |  |  |  |  |  |  |
|           |                                                                                                              |                                                                                                                                                                                                                                                                                                           |                                                                                     |  |  |  |  |  |  |
|           |                                                                                                              |                                                                                                                                                                                                                                                                                                           |                                                                                     |  |  |  |  |  |  |
|           |                                                                                                              |                                                                                                                                                                                                                                                                                                           |                                                                                     |  |  |  |  |  |  |
| <b>4</b>  | Consulting fees                                                                                              | <input type="checkbox"/> <b>None</b><br><table border="1" style="width: 100%; border-collapse: collapse;"> <tr><td style="width: 50%; height: 20px;"></td><td style="width: 50%;"></td></tr> <tr><td style="height: 20px;"></td><td></td></tr> <tr><td style="height: 20px;"></td><td></td></tr> </table> |                                                                                     |  |  |  |  |  |  |
|           |                                                                                                              |                                                                                                                                                                                                                                                                                                           |                                                                                     |  |  |  |  |  |  |
|           |                                                                                                              |                                                                                                                                                                                                                                                                                                           |                                                                                     |  |  |  |  |  |  |
|           |                                                                                                              |                                                                                                                                                                                                                                                                                                           |                                                                                     |  |  |  |  |  |  |
| <b>5</b>  | Payment or honoraria for lectures, presentations, speakers bureaus, manuscript writing or educational events | <input type="checkbox"/> <b>None</b><br><table border="1" style="width: 100%; border-collapse: collapse;"> <tr><td style="width: 50%; height: 20px;"></td><td style="width: 50%;"></td></tr> <tr><td style="height: 20px;"></td><td></td></tr> <tr><td style="height: 20px;"></td><td></td></tr> </table> |                                                                                     |  |  |  |  |  |  |
|           |                                                                                                              |                                                                                                                                                                                                                                                                                                           |                                                                                     |  |  |  |  |  |  |
|           |                                                                                                              |                                                                                                                                                                                                                                                                                                           |                                                                                     |  |  |  |  |  |  |
|           |                                                                                                              |                                                                                                                                                                                                                                                                                                           |                                                                                     |  |  |  |  |  |  |
| <b>6</b>  | Payment for expert testimony                                                                                 | <input type="checkbox"/> <b>None</b><br><table border="1" style="width: 100%; border-collapse: collapse;"> <tr><td style="width: 50%; height: 20px;"></td><td style="width: 50%;"></td></tr> <tr><td style="height: 20px;"></td><td></td></tr> <tr><td style="height: 20px;"></td><td></td></tr> </table> |                                                                                     |  |  |  |  |  |  |
|           |                                                                                                              |                                                                                                                                                                                                                                                                                                           |                                                                                     |  |  |  |  |  |  |
|           |                                                                                                              |                                                                                                                                                                                                                                                                                                           |                                                                                     |  |  |  |  |  |  |
|           |                                                                                                              |                                                                                                                                                                                                                                                                                                           |                                                                                     |  |  |  |  |  |  |
| <b>7</b>  | Support for attending meetings and/or travel                                                                 | <input type="checkbox"/> <b>None</b><br><table border="1" style="width: 100%; border-collapse: collapse;"> <tr><td style="width: 50%; height: 20px;"></td><td style="width: 50%;"></td></tr> <tr><td style="height: 20px;"></td><td></td></tr> <tr><td style="height: 20px;"></td><td></td></tr> </table> |                                                                                     |  |  |  |  |  |  |
|           |                                                                                                              |                                                                                                                                                                                                                                                                                                           |                                                                                     |  |  |  |  |  |  |
|           |                                                                                                              |                                                                                                                                                                                                                                                                                                           |                                                                                     |  |  |  |  |  |  |
|           |                                                                                                              |                                                                                                                                                                                                                                                                                                           |                                                                                     |  |  |  |  |  |  |
| <b>8</b>  | Patents planned, issued or pending                                                                           | <input type="checkbox"/> <b>None</b><br><table border="1" style="width: 100%; border-collapse: collapse;"> <tr><td style="width: 50%; height: 20px;"></td><td style="width: 50%;"></td></tr> <tr><td style="height: 20px;"></td><td></td></tr> <tr><td style="height: 20px;"></td><td></td></tr> </table> |                                                                                     |  |  |  |  |  |  |
|           |                                                                                                              |                                                                                                                                                                                                                                                                                                           |                                                                                     |  |  |  |  |  |  |
|           |                                                                                                              |                                                                                                                                                                                                                                                                                                           |                                                                                     |  |  |  |  |  |  |
|           |                                                                                                              |                                                                                                                                                                                                                                                                                                           |                                                                                     |  |  |  |  |  |  |
| <b>9</b>  | Participation on a Data Safety Monitoring Board or Advisory Board                                            | <input type="checkbox"/> <b>None</b><br><table border="1" style="width: 100%; border-collapse: collapse;"> <tr><td style="width: 50%; height: 20px;"></td><td style="width: 50%;"></td></tr> <tr><td style="height: 20px;"></td><td></td></tr> <tr><td style="height: 20px;"></td><td></td></tr> </table> |                                                                                     |  |  |  |  |  |  |
|           |                                                                                                              |                                                                                                                                                                                                                                                                                                           |                                                                                     |  |  |  |  |  |  |
|           |                                                                                                              |                                                                                                                                                                                                                                                                                                           |                                                                                     |  |  |  |  |  |  |
|           |                                                                                                              |                                                                                                                                                                                                                                                                                                           |                                                                                     |  |  |  |  |  |  |
| <b>10</b> | Leadership or fiduciary role in other board,                                                                 | <input type="checkbox"/> <b>None</b><br><table border="1" style="width: 100%; border-collapse: collapse;"> <tr><td style="width: 50%; height: 20px;"></td><td style="width: 50%;"></td></tr> </table>                                                                                                     |                                                                                     |  |  |  |  |  |  |
|           |                                                                                                              |                                                                                                                                                                                                                                                                                                           |                                                                                     |  |  |  |  |  |  |

|           |                                                                                  | Name all entities with whom you have this relationship or indicate none (add rows as needed) | Specifications/Comments (e.g., if payments were made to you or to your institution) |
|-----------|----------------------------------------------------------------------------------|----------------------------------------------------------------------------------------------|-------------------------------------------------------------------------------------|
|           | society, committee or advocacy group, paid or unpaid                             |                                                                                              |                                                                                     |
| <b>11</b> | Stock or stock options                                                           | <input type="checkbox"/> <b>None</b>                                                         |                                                                                     |
|           |                                                                                  |                                                                                              |                                                                                     |
|           |                                                                                  |                                                                                              |                                                                                     |
| <b>12</b> | Receipt of equipment, materials, drugs, medical writing, gifts or other services | <input type="checkbox"/> <b>None</b>                                                         |                                                                                     |
|           |                                                                                  |                                                                                              |                                                                                     |
|           |                                                                                  |                                                                                              |                                                                                     |
| <b>13</b> | Other financial or non-financial interests                                       | <input checked="" type="checkbox"/> <b>None</b>                                              |                                                                                     |
|           |                                                                                  |                                                                                              |                                                                                     |
|           |                                                                                  |                                                                                              |                                                                                     |

Please place an "X" next to the following statement to indicate your agreement:

I certify that I have answered every question and have not altered the wording of any of the questions on this form.
